# Supplementary material for: A Novel Method for Energy Efficiency in Internet of Thing (IoT) through Fuzzy Logic and Genetic-Algorithm-Based Clustering applied for Agriculture Monitoring
Source: Research Square preprint supplement (doi:10.21203/rs.3.rs-2898962/v1), 2023-08-08
Supplement: Supplementary file 1 [file 8595a7bfb3587af53b7188c9.docx]

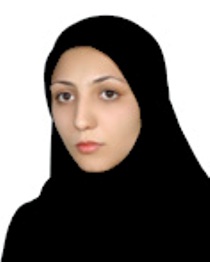
**Shayesteh Tabatabaei** received her B.Sc. and M.Sc. degrees in Computer Engineering from Islamic Azad University, Shabestar, Iran, in 2006 and 2008 and then continued her study for Ph.D. in Computer Science Branch Software in Islamic Azad University, Science and Research Branch, Tehran, Iran. Her research interests include routing, QOS, security, and clustering for mobile ad hoc networks and wireless sensor networks.
